# Supplementary material for: Bioprinting Via a Dual-Gel Bioink Based on Poly(Vinyl Alcohol) and Solubilized Extracellular Matrix towards Cartilage Engineering
Source: PubMed Central journal article supplement (PMC8069267; doi:10.3390/ijms22083901), 2021-04-09
Supplement: ijms-22-03901-s001.pdf [file ijms-22-03901-s001.pdf]

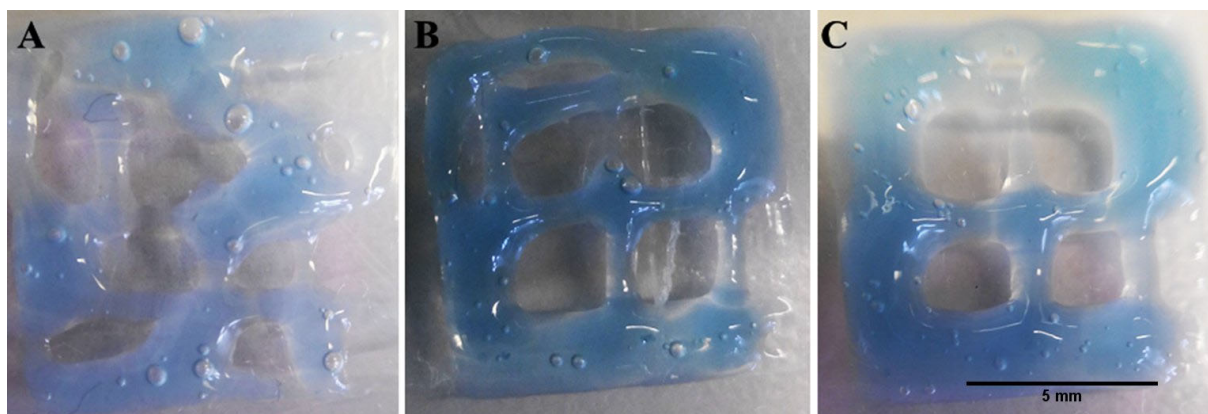

**Figure S1.** Images of 3D printed biomaterial inks A) PVA-A, B) PVA-A/SDCM30, and C) PVA-A/SDCM50 crosslinked by 0.1% (wt/wt) genipin as crosslinker (scale bar 5 mm). Scaffolds printed in the geometry of a cube (theoretical side length = 10 mm, (3 strands, 3.50 mm between strands)).

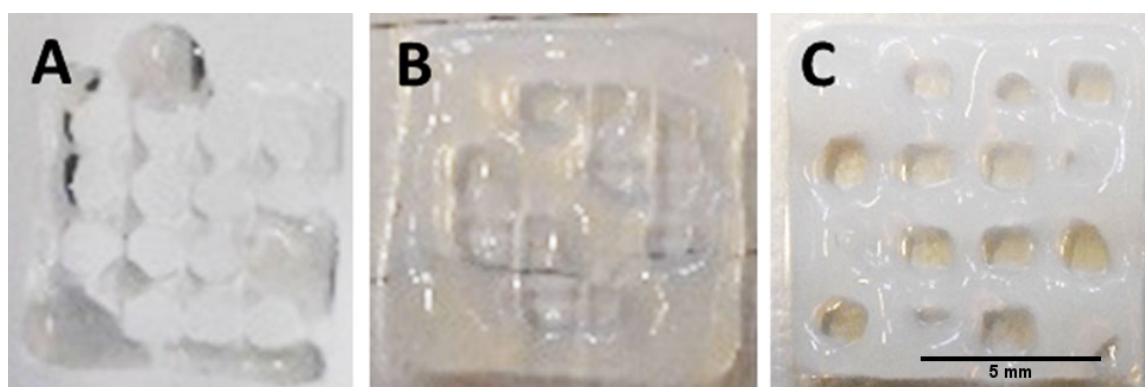

**Figure S2.** Images of 3D printed hydrogels A) PVA-Nb, B) PVA-Nb/SDCM30, and C) PVA-Nb/SDCM50 (scale bar 5 mm). Scaffolds printed in the geometry of a cube (theoretical side length = 10 mm, 5 strands, 1.50 mm between strands, total height = 2 mm). Porous-like structures can be seen in the PVA-Nb/SDCM50 scaffold. .

# I

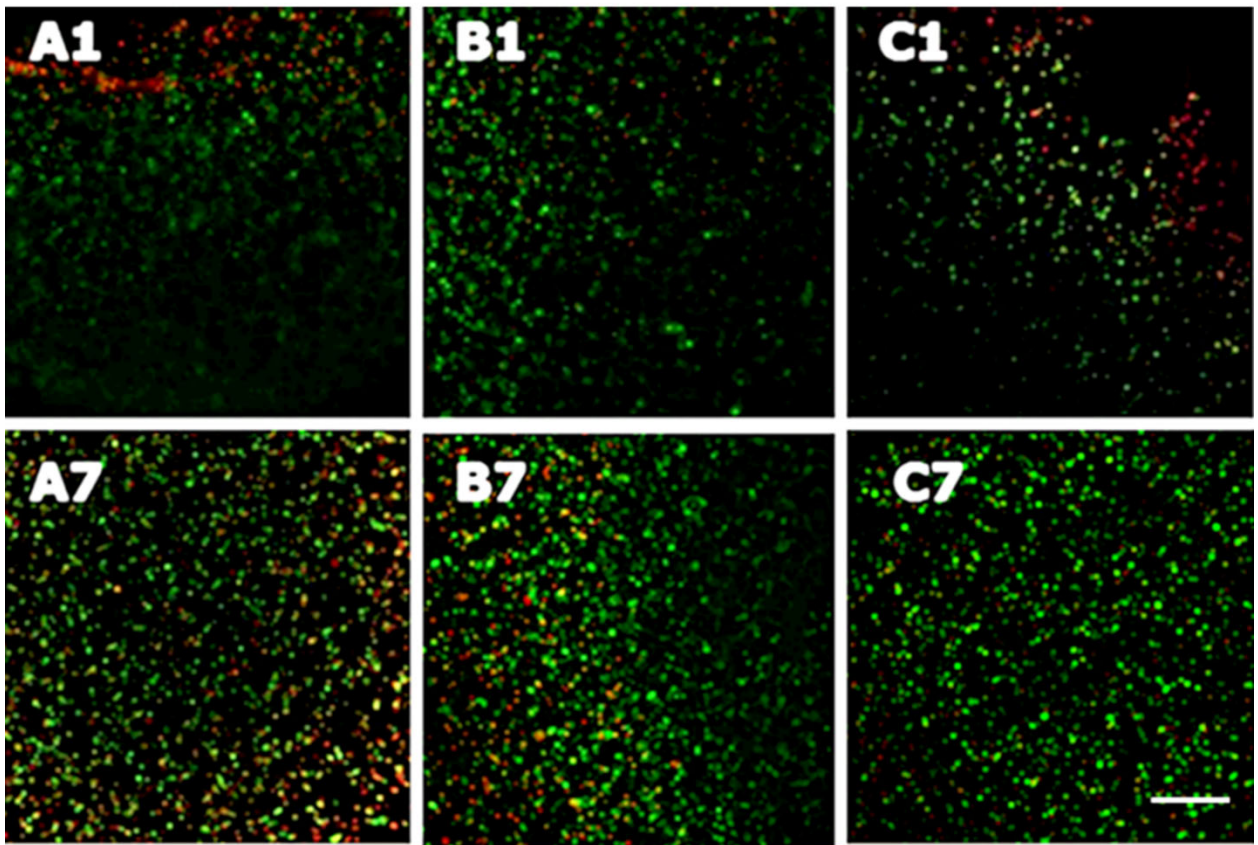

# II

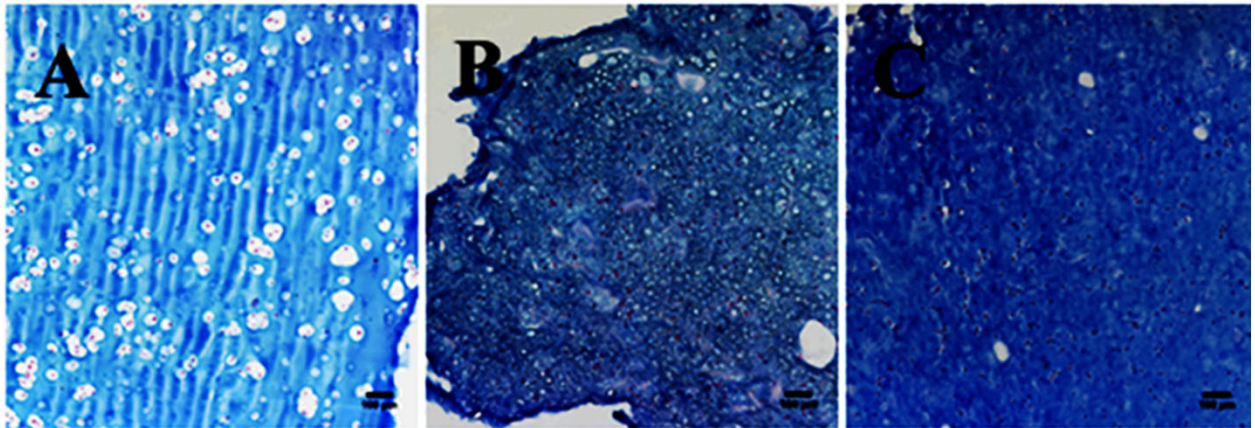

### III

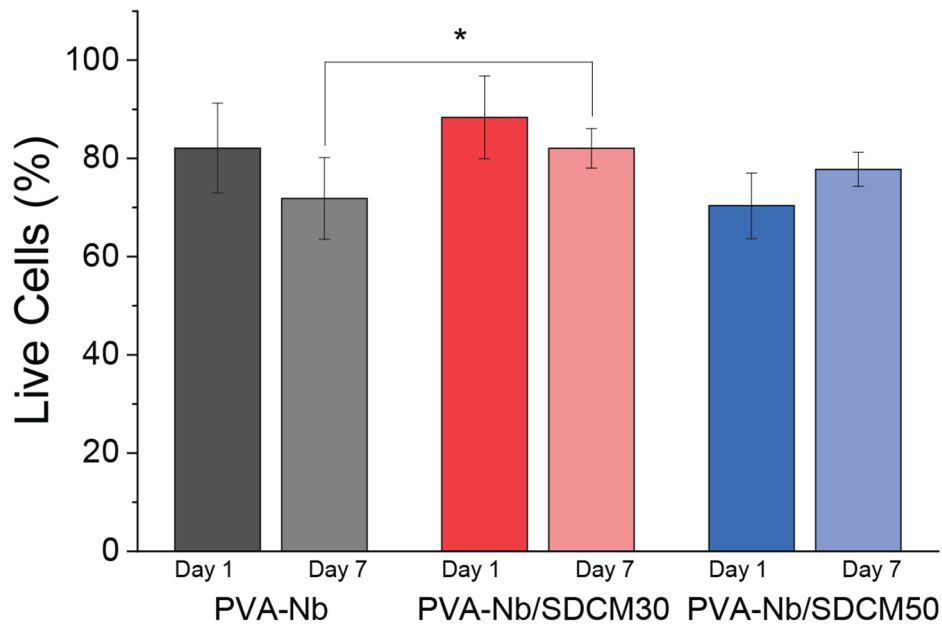

**Figure S3.** I) Cell viability of ATDC5 cells in the bulk hydrogels, A) PVA-Nb, B) PVA-Nb/SDCM30 and C) PVA-Nb/SDCM50 over day 1 and 7. Green stain represents live cells and red stain represents dead cells (scale bar: 100  $\mu\text{m}$ ). II) Morphology and distribution of ATDC5 cells in the bulk hydrogels over day 7 using alcian blue – fast red staining (scale bar: 100  $\mu\text{m}$ ). III) Quantification of cell viability of the bulk hydrogels after 1 and 7 days of culture.  $n = 5$ ,  $*p < 0.05$ .

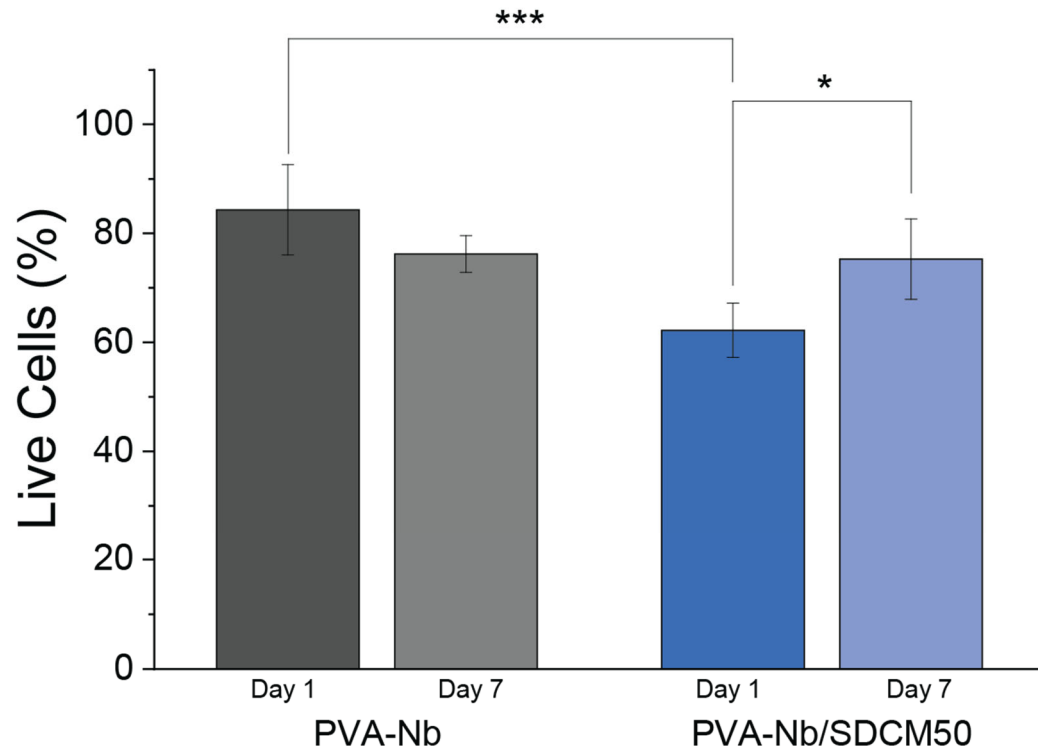

**Figure S4.** Quantification of cell viability of printed constructs after 1 and 7 days of culture. n = 5, \*p < 0.05, \*\*\*p < 0.01.

MERLN\_MS\_20170503.1.fid  
PVA 1-1, 1D ZGpr, in D2O, 24 scans, T=325K  
D1=5s, AQ=1.46s

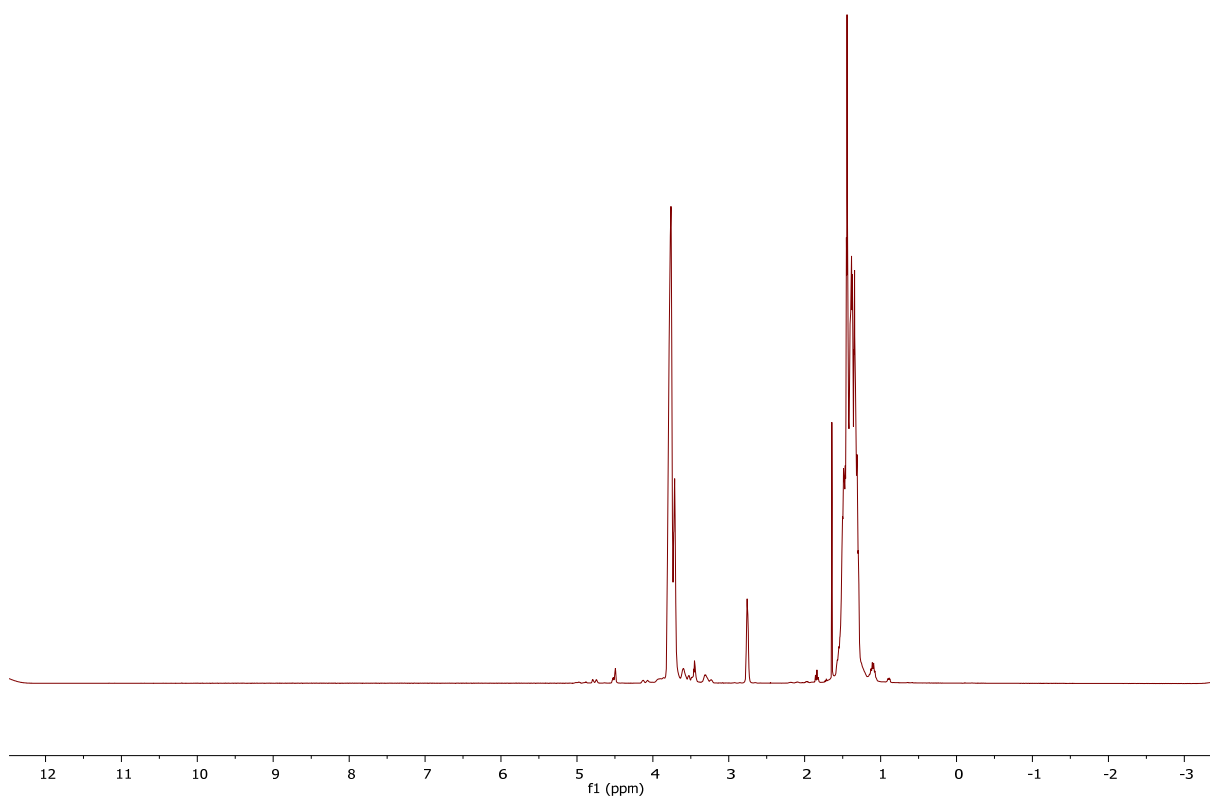

PVA-A/PVA-A1-50  
PVA 1-2, 1D ZGpr, in D2O, 24 scans, T=325K  
D1=5s, AQ=1.46s

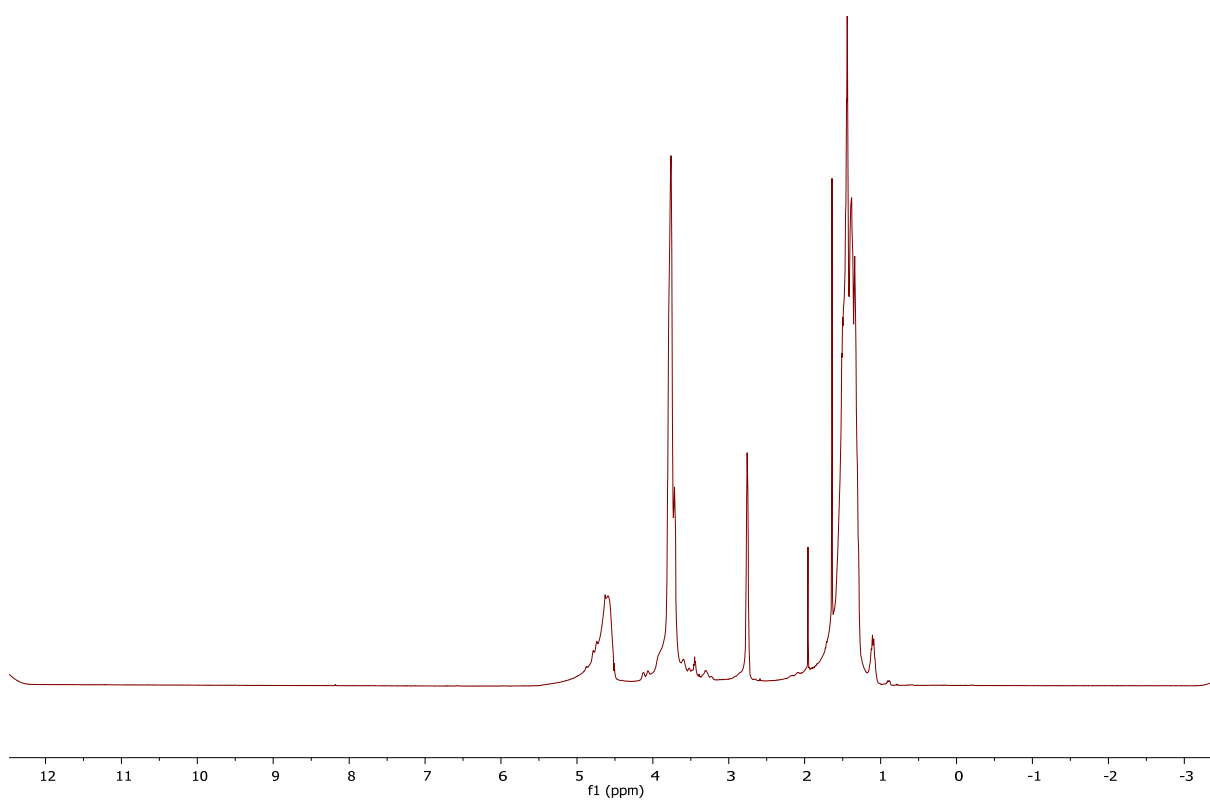

PVA-A/PVA-A1-100  
PVA 1-3, 1D ZGpr, in D2O, 24 scans, T=325K  
D1=5s, AQ=1.46s

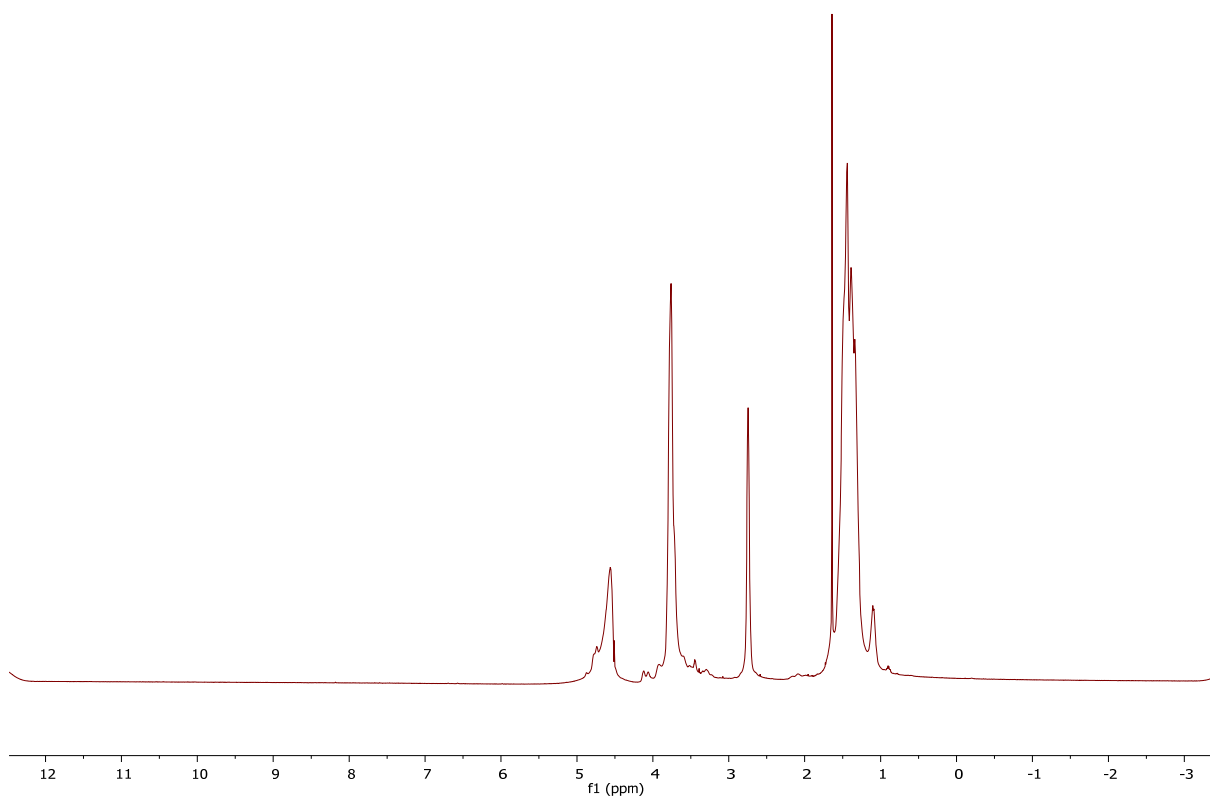

**Figure S5.**  $^1\text{H}$  NMRs of amine modified PVA in  $\text{D}_2\text{O}$ . From top to bottom: PVA-A1-10, PVA-A1-50, PVA-A1-100

PVA-A/PVA-A2-10  
PVA 2-1, 1D ZGpr, in D2O 24 scans, T=325K  
D1=5s, AQ=1.46s

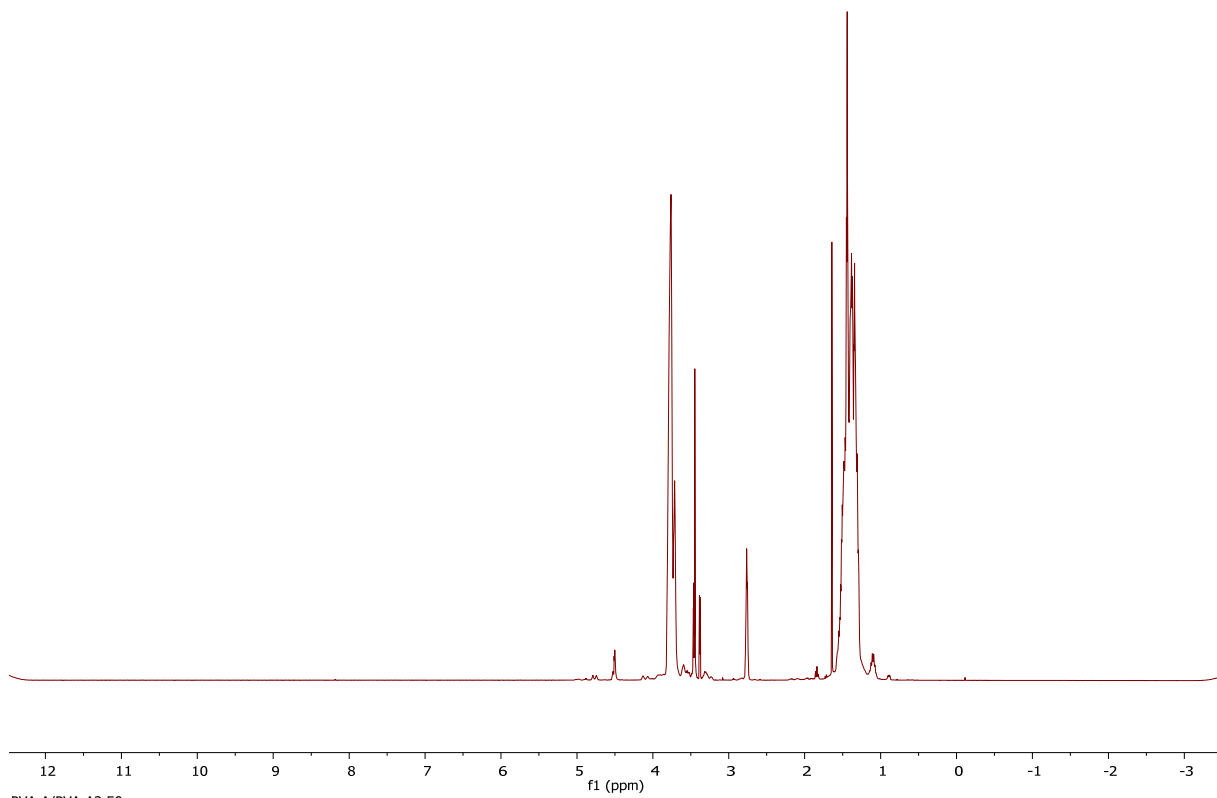

PVA-A/PVA-A2-50  
PVA 2-2, 1D ZGpr, in D2O, 24 scans, T=325K  
D1=5s, AQ=1.46s

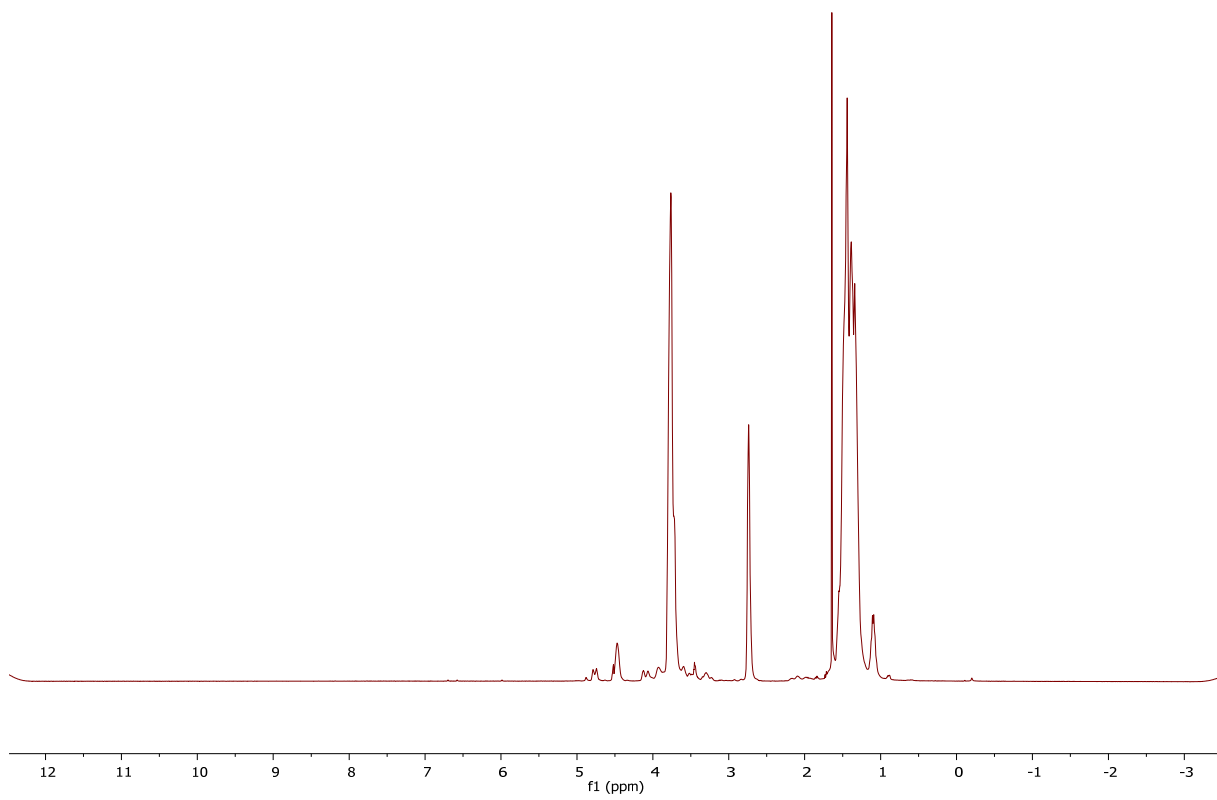

PVA-A/PVA-A2-100  
PVA 2-3, 1D ZGpr, in D2O, 24 scans, T=325K  
D1=5s, AQ=1.46s

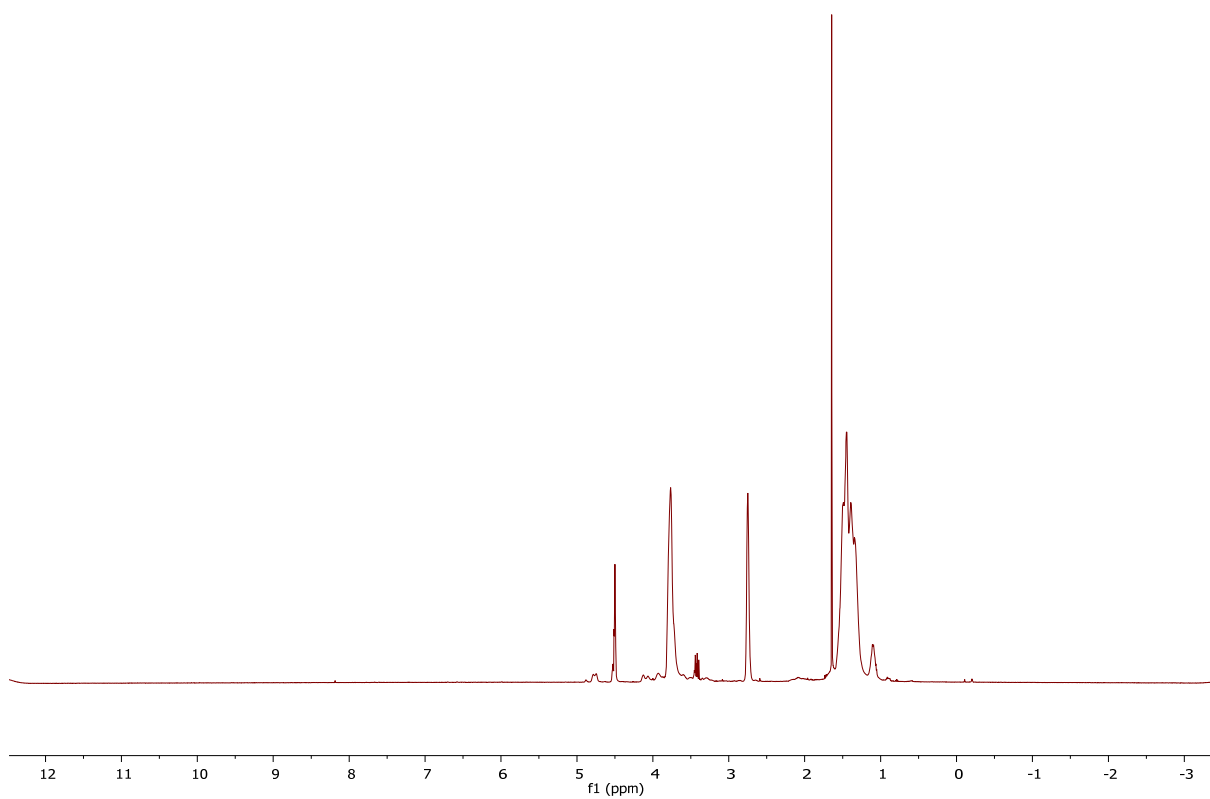

**Figure S6.**  $^1\text{H}$  NMRs of amine modified PVA in  $\text{D}_2\text{O}$ . From top to bottom: PVA-A2-10, PVA-A2-50, PVA-A2-100,



PVA-A/PVA-A24-10  
PVA 3-1, 1D ZGpr, in D2O, 24 scans, T=325K  
D1=5s, AQ=1.46s

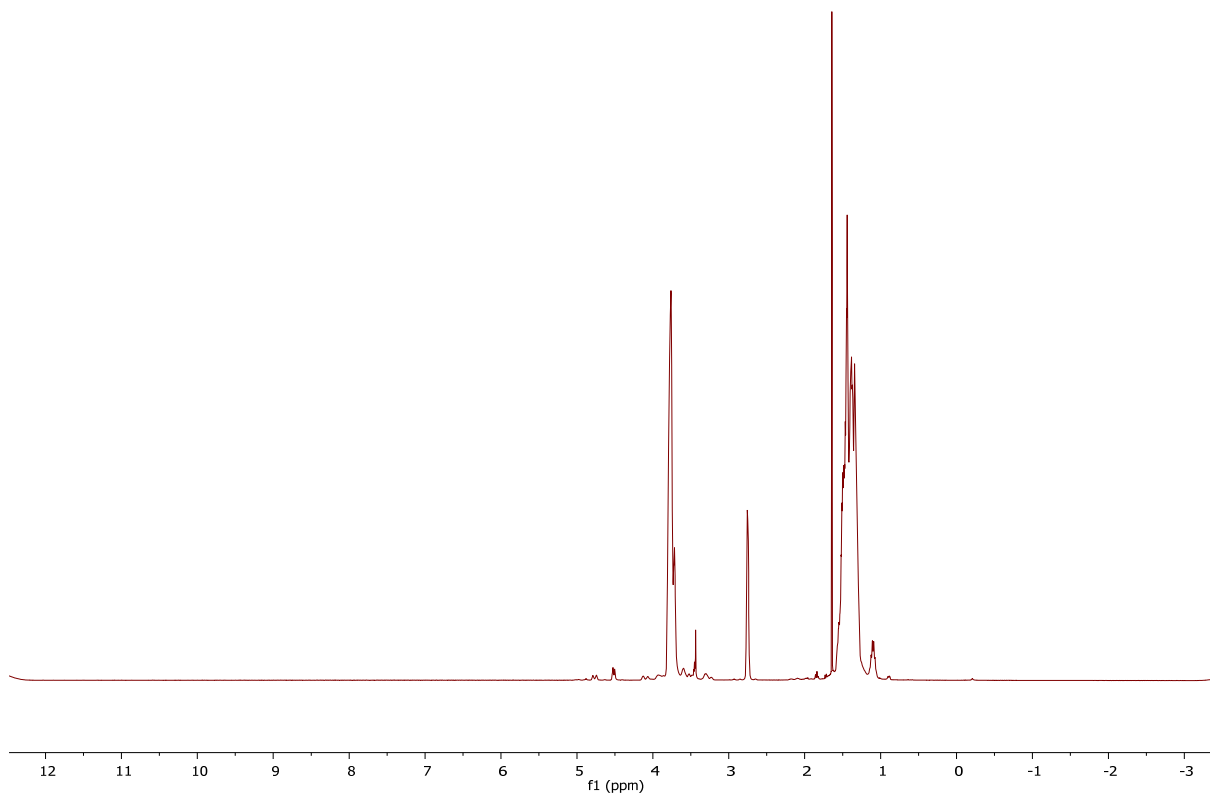

PVA-A/PVA-A24-50  
PVA 3-2, 1D ZGpr, in D2O, 24 scans, T=325K  
D1=5s, AQ=1.46s

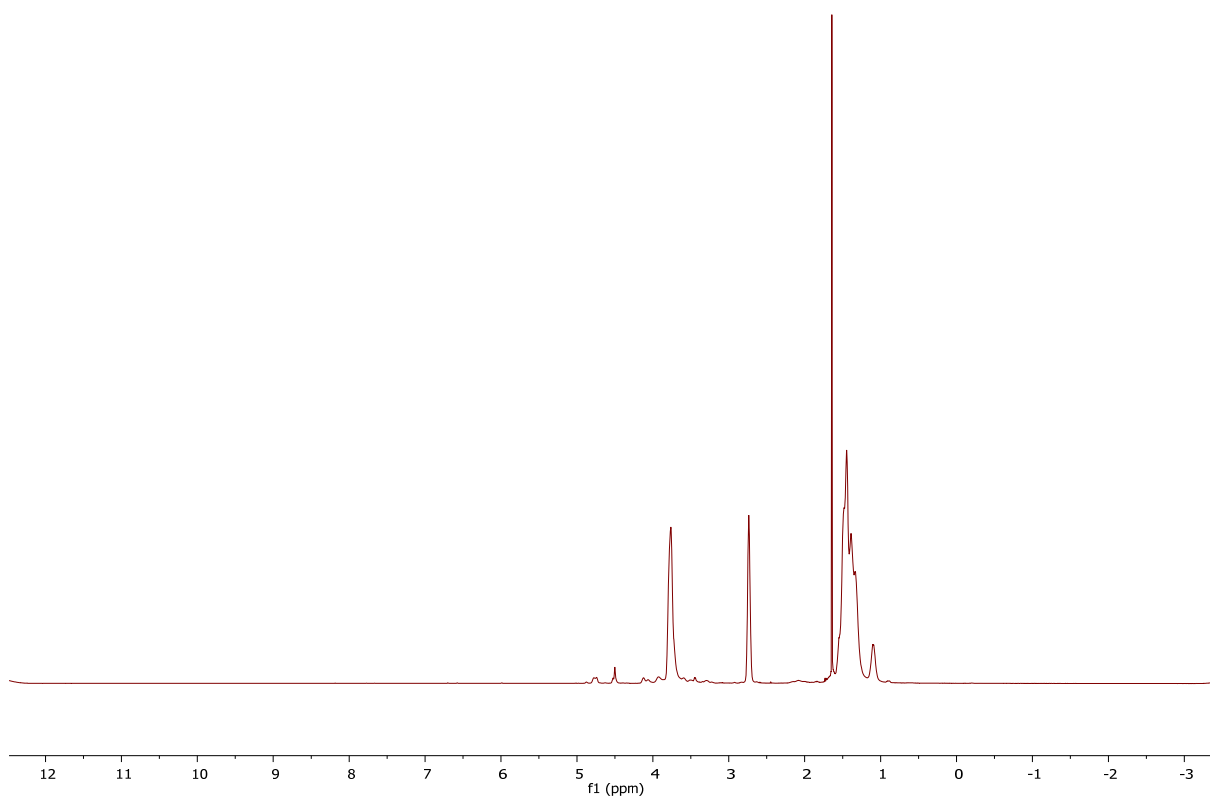

PVA-A/PVA-A24-100  
PVA 3-3, 1D ZGpr, in D<sub>2</sub>O, 24 scans, T=325K  
D1=5s, AQ=1.46s

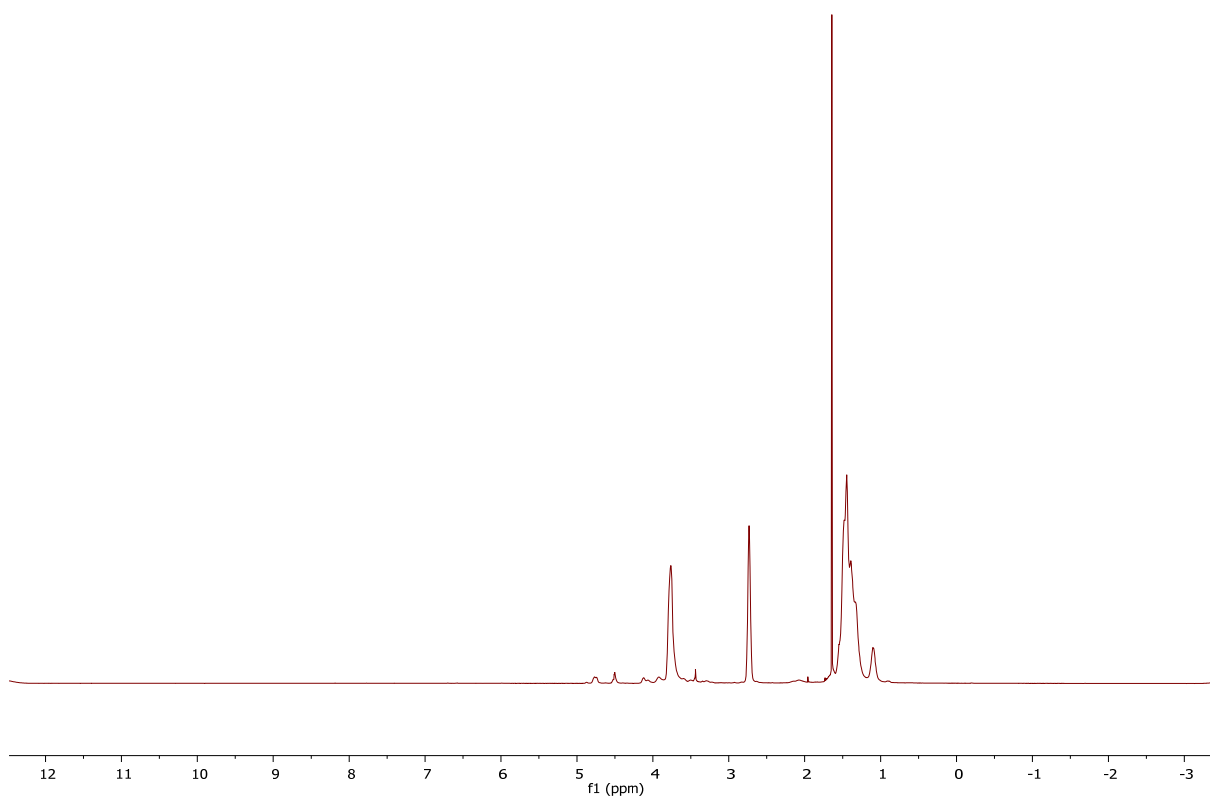

**Figure S7.** <sup>1</sup>H NMRs of amine modified PVA in D<sub>2</sub>O. From top to bottom: PVA-A24-10, PVA-A24-50, PVA-A24-100

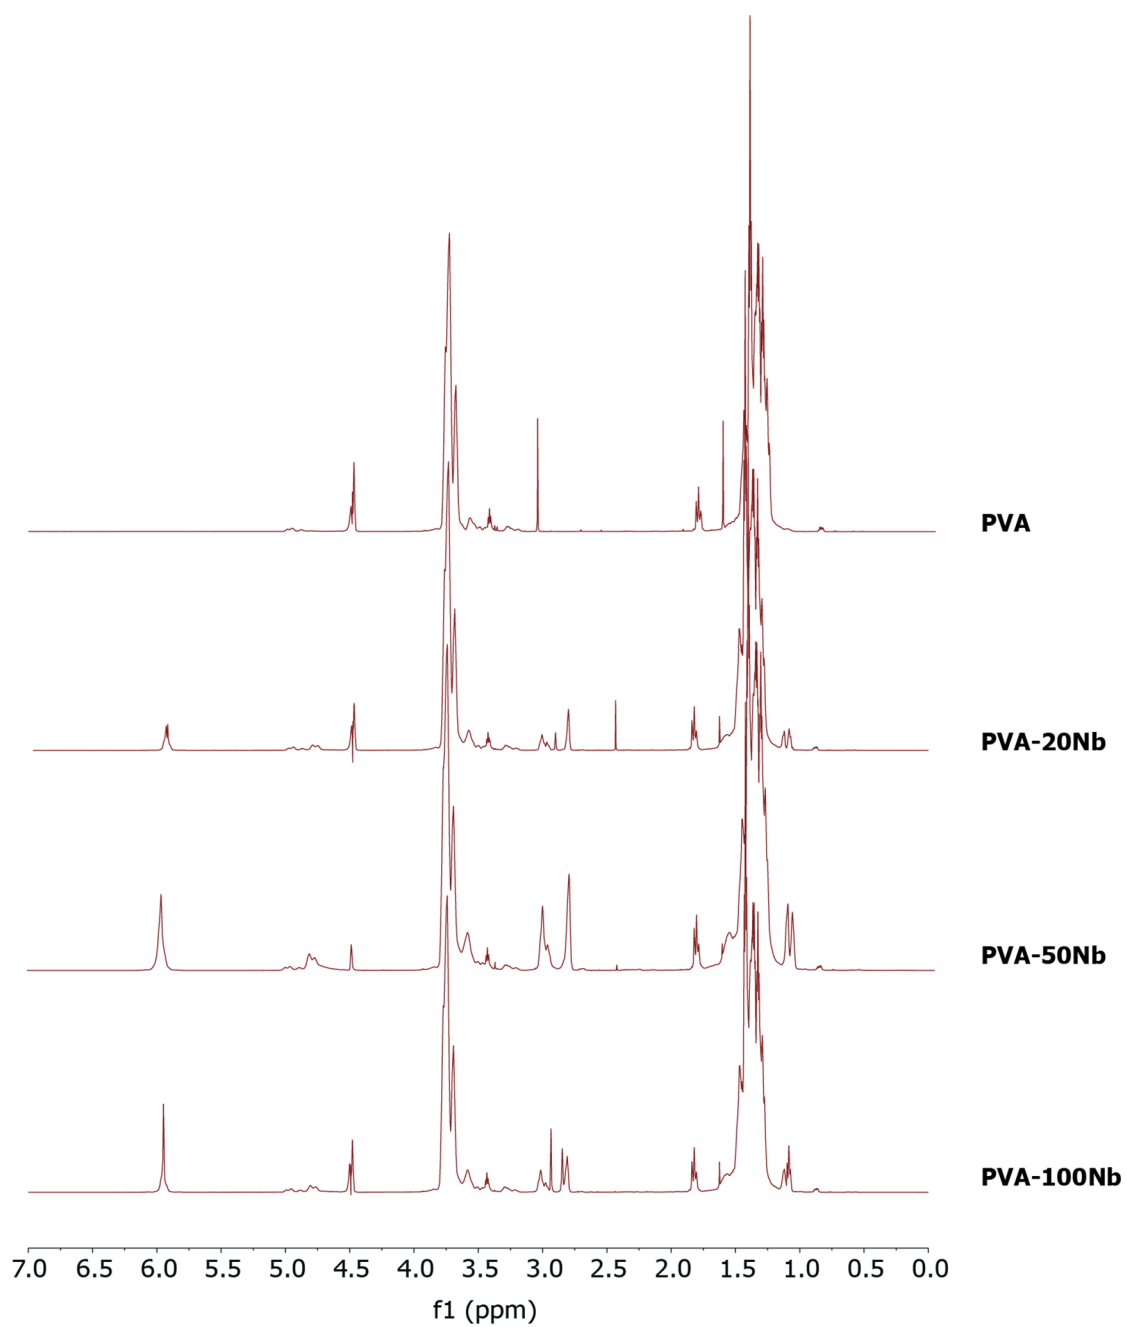

**Figure S8.**  $^1\text{H}$  NMRs of norbornene modified PVA in  $\text{D}_2\text{O}$ . From top to bottom: PVA, PVA-Nb (0.2 equiv), PVA-Nb (0.5 equiv), PVA-Nb (1 equiv)
